# Supplementary material for: A two-hit mechanism causes cerebral cavernous malformations: complete inactivation of CCM1, CCM2 or CCM3 in affected endothelial cells
Source: PubMed Central journal article supplement — Hum Mol Genet. 2008 Dec 16;18(5):911–8. doi: 10.1093/hmg/ddn420 (PMC2640205; doi:10.1093/hmg/ddn420), 2008-12-16

**Supplemental Figure 1.** (A) CCM1 protein expression in cavernous endothelia from a *CCM1*:c.1683\_1684insA germline mutation carrier (No. 1, table 1) is markedly reduced while (D) the gene product of *CCM1*:c.2143-2A>G germline mutation carrier (No. 3, table 1) retains immunoreactivity in accordance with *in vitro* data (18). (H, K) Two sibs carrying a *CCM2* mutation at the N-terminus of the gene product (No. 5, 6, table 1) reveal unequivocal immunonegativity for the anti-CCM2 antibody. (B-C, E-F, G, I, J, L) Concomitant expression of the other two CCM proteins.

*CCM1*:c.1683\_1684insA

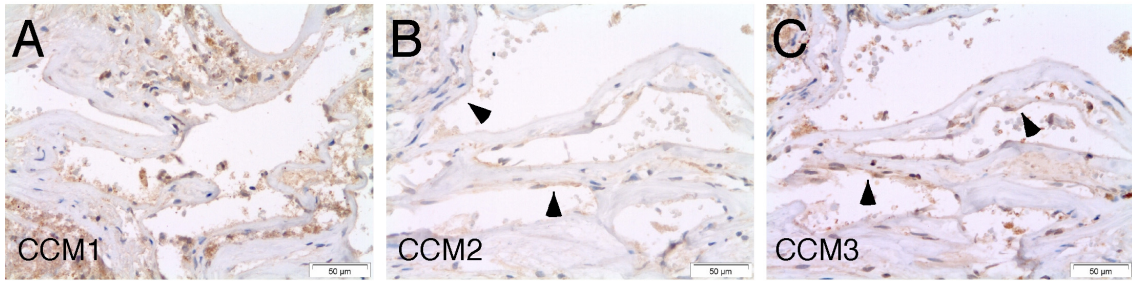

*CCM1*:c.2143-2A>G

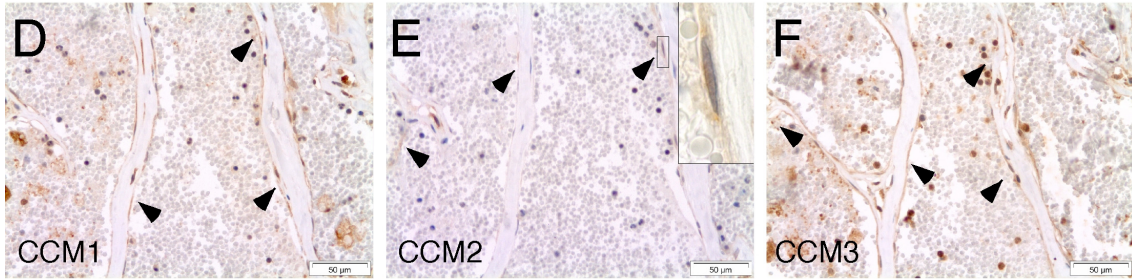

*CCM2*:c.55C>T

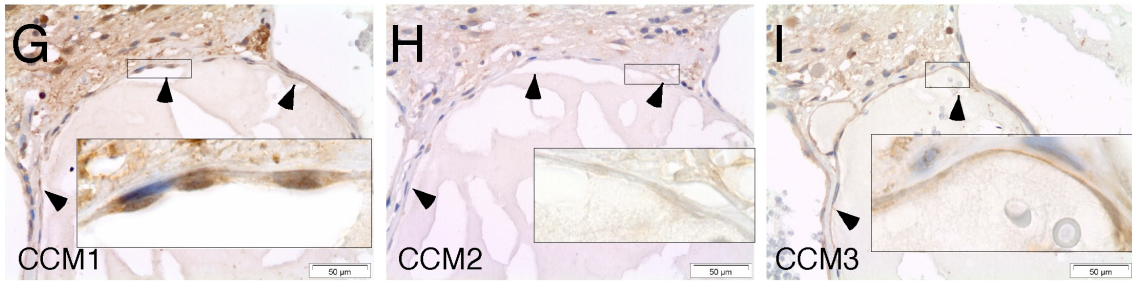

*CCM2*:c.55C>T

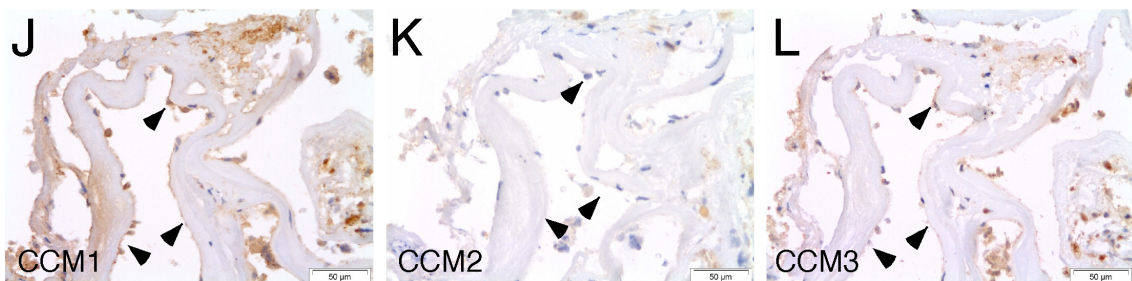

Supplement: ddn420_1.pdf [file ddn420_1.pdf]
